# Supplementary material for: Reusable piezocatalytic water disinfection activity of CVD-grown few-layer WS2 on sapphire substrate
Source: Royal Society of Chemistry journal article supplement (doi:10.1039/d1en00926e), 2021-12-28
Supplement: d1en00926e1.pdf [file d1en00926e1.pdf]

**Reusable Piezo-catalytic Water Disinfection Activity of CVD Grown WS<sub>2</sub> Few-layer on  
Sapphire Substrate**

Deepa Thakur<sup>1</sup>, Moolchand Sharma<sup>1</sup>, Viswanath Balakrishnan<sup>1\*</sup> and Rahul Vaish<sup>1\*</sup>

School of Engineering, Indian Institute of Technology Mandi, Mandi, Himachal Pradesh,  
India 175075

**\*Corresponding author E-mail address: viswa@iitmandi.ac.in, rahul@iitmandi.ac.in**

<sup>1</sup>Both authors contributed equally.

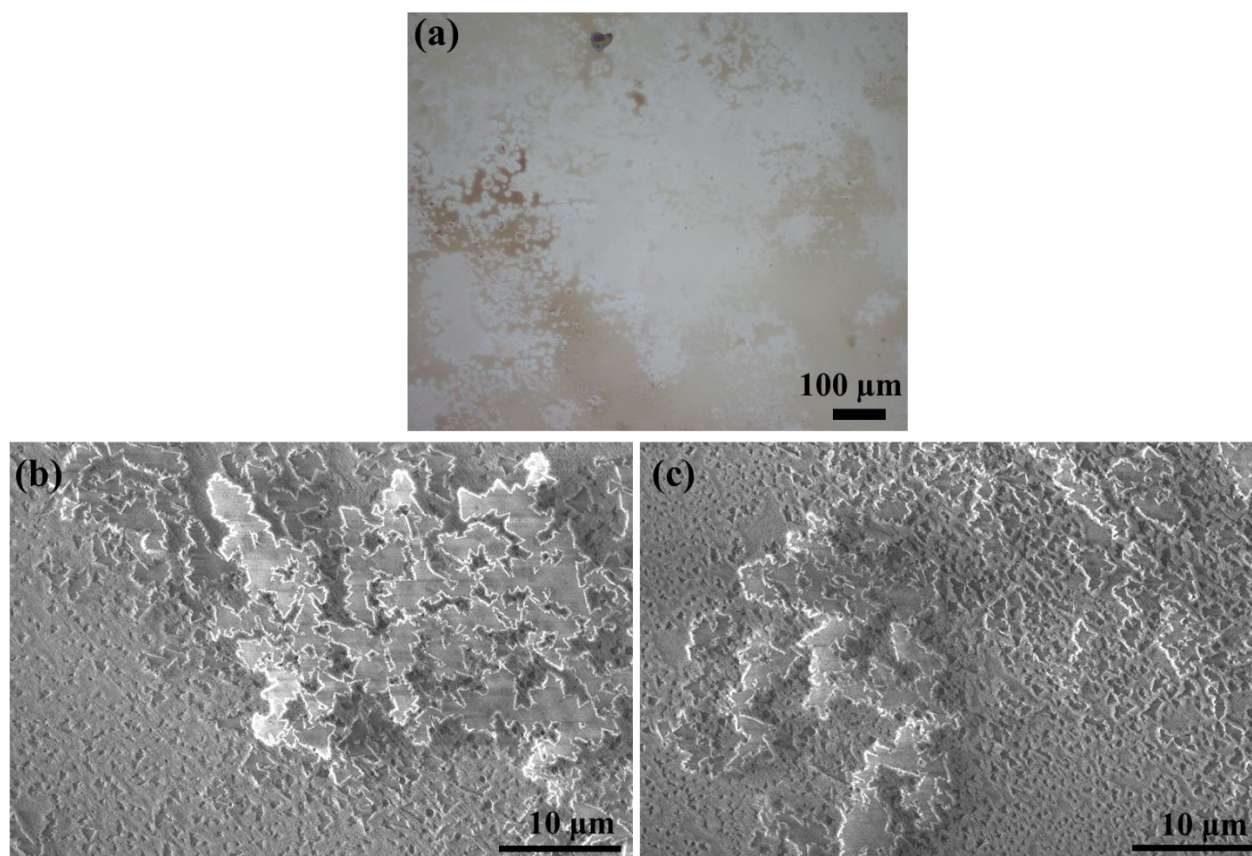

**Figure S1: (a) Optical image of large area growth of few layer WS<sub>2</sub> is shown. (b) and (c) FESEM image to show coalescence and multilayer formation.**

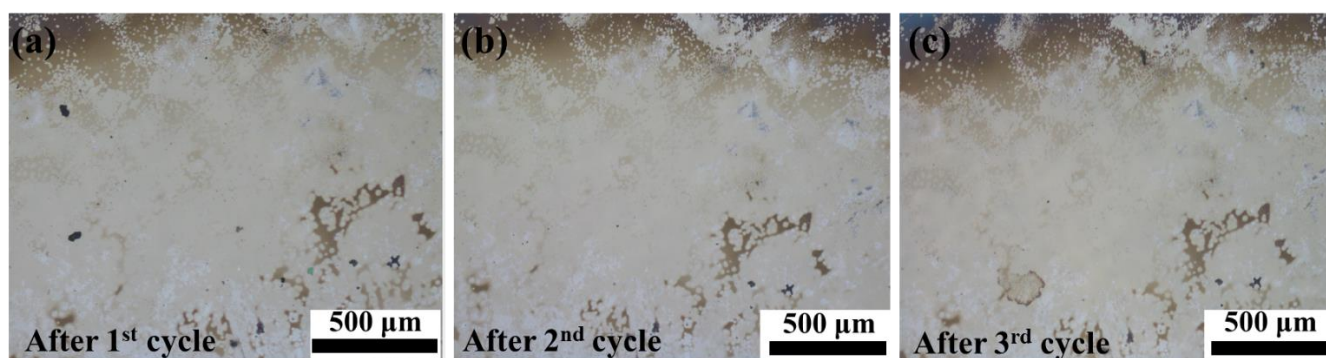

**Figure S2: Optical images shows recovery of catalyst after three piezocatalytic cycles.**

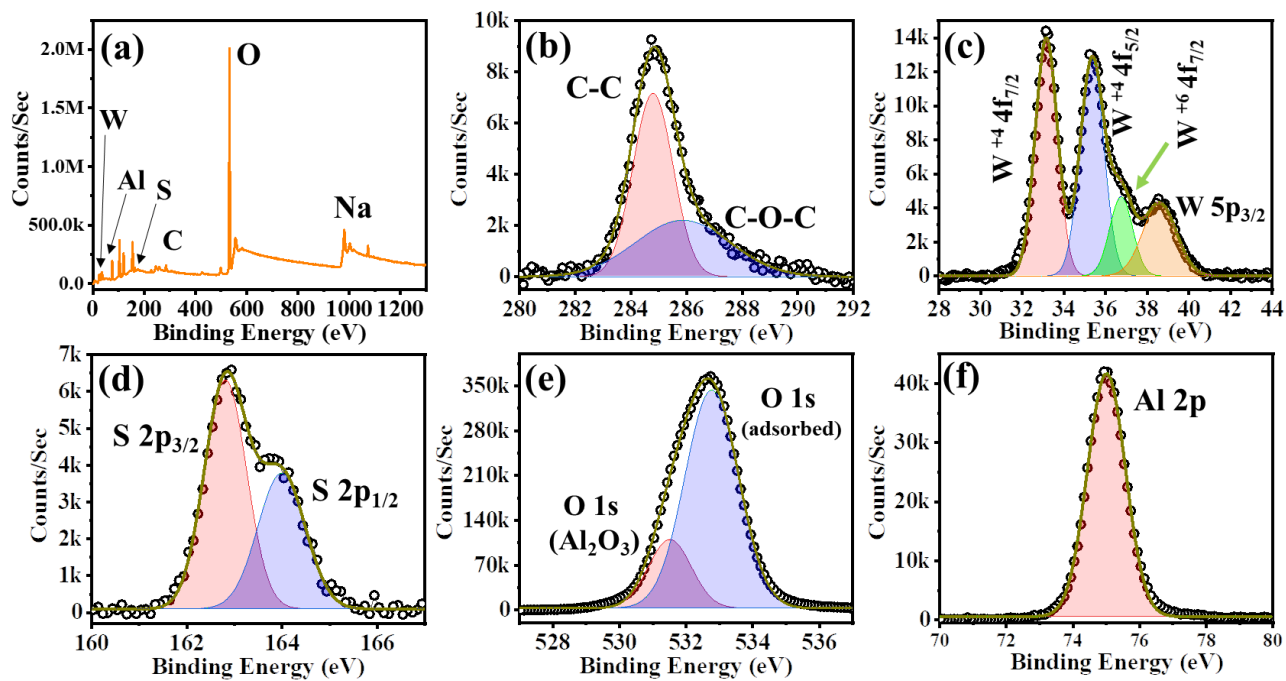

**Figure S3: Surface analysis of catalyst after five cycles. (a) XPS Survey scan. Individual high-resolution (b) C scan, (c) W scan, (d) S scan, (e) O scan and (f) Al scan.**

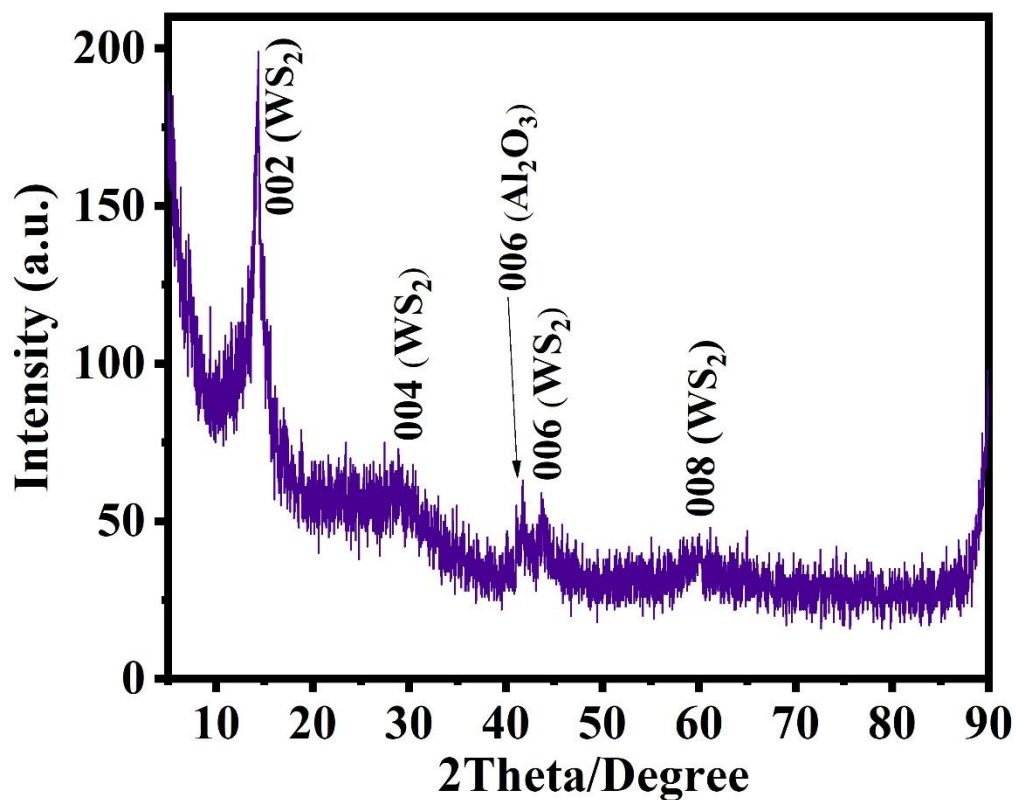

**Figure S4: XRD analysis of WS<sub>2</sub> grown over sapphire substrate.**

A comparative summary of piezocatalysis by other researchers is presented in table shown below:

| Sr. No. | Materials                            | Application     | Reaction rate   | sonicator conditions | Dye/pollutant | Catalyst amount | Ref.         |
|---------|--------------------------------------|-----------------|-----------------|----------------------|---------------|-----------------|--------------|
| 1       | Single and few layer WS <sub>2</sub> | dye degradation | 99.7% in 60 min | 300 W                | MB 40 mg/L    | 10 mg           | <sup>1</sup> |

|   |                                                     |                                   |                                                                                                                                    |                  |                                                              |                                                                              |              |
|---|-----------------------------------------------------|-----------------------------------|------------------------------------------------------------------------------------------------------------------------------------|------------------|--------------------------------------------------------------|------------------------------------------------------------------------------|--------------|
| 2 | MoS <sub>2</sub>                                    | H <sub>2</sub> evolution          | 29.1 $\mu$ mol g <sup>-1</sup> h <sup>-1</sup>                                                                                     | 110 W and 40 kHz | RB (100 mL, 10 mg/L)                                         | 20 mg catalyst for H <sub>2</sub> evolution and 10 mg for RB dye degradation | <sup>2</sup> |
|   | Few layer                                           | ion                               |                                                                                                                                    |                  |                                                              |                                                                              |              |
|   |                                                     | Dye degradation                   | 96% in 60 min                                                                                                                      |                  |                                                              |                                                                              |              |
|   | WS <sub>2</sub>                                     | H <sub>2</sub> evolution          | 15.4 $\mu$ mol g <sup>-1</sup> h <sup>-1</sup>                                                                                     |                  |                                                              |                                                                              |              |
|   | Few layer                                           | ion                               |                                                                                                                                    |                  |                                                              |                                                                              |              |
|   |                                                     | Dye degradation                   | 65.7% in 60 min                                                                                                                    |                  |                                                              |                                                                              |              |
| 3 | WSe <sub>2</sub>                                    | H <sub>2</sub> evolution          | 11.3 $\mu$ mol g <sup>-1</sup> h <sup>-1</sup>                                                                                     | 300 W, 40 kHz    | RB (10 mg/L)<br>And E coli (2 × 10 <sup>8</sup> bacteria/mL) | 300 mg                                                                       | <sup>3</sup> |
|   | Few layer                                           | ion                               |                                                                                                                                    |                  |                                                              |                                                                              |              |
|   |                                                     | Dye degradation                   | 43.5% in 60 min                                                                                                                    |                  |                                                              |                                                                              |              |
|   | PDMS embedded monolayer WS <sub>2</sub> nanoflowers | dye degradation and antibacterial | 0.13 (ppms <sup>-1</sup> ) degradation rate:<br>~6624 ppm L mole <sup>-1</sup> s <sup>-1</sup><br>Antibacterial: 99.99% in 60 min. |                  |                                                              |                                                                              |              |
|   | WS <sub>2</sub>                                     | dye degradation                   |                                                                                                                                    |                  |                                                              |                                                                              |              |
|   |                                                     | antibacterial                     |                                                                                                                                    |                  |                                                              |                                                                              |              |
| 4 | Co doped                                            | dye degradation                   | 73.6% MB in 25 min                                                                                                                 | 40 kHz, 100W     | MB (30 mg/L)                                                 | 10 mg                                                                        | <sup>4</sup> |

|   |                                                                  |                                       |                                                                                                                                                 |                  |                                 |        |              |
|---|------------------------------------------------------------------|---------------------------------------|-------------------------------------------------------------------------------------------------------------------------------------------------|------------------|---------------------------------|--------|--------------|
|   | MoS <sub>2</sub> ,<br>3.2 nm<br>thick                            | on                                    |                                                                                                                                                 |                  |                                 |        |              |
| 5 | MoSe <sub>2</sub><br>NFs<br>Single<br>and few<br>layer           | dye<br>degradati<br>on                | 90 % in 30<br>sec<br>K <sub>obs</sub> :0.3<br>ppm s <sup>-1</sup><br>Degradation<br>rate:<br>69,889 ppm L<br>mole <sup>-1</sup> s <sup>-1</sup> | 250 W, 40<br>kHz | RhB<br>[1 × 10 <sup>-5</sup> m] | 10 mg  | <sup>5</sup> |
| 6 | MoS <sub>2</sub><br>Nano<br>Flowers                              | dye<br>degradati<br>on                | 40336 ppm L<br>mol <sup>-1</sup> s <sup>-1</sup><br>(93% in 60 s)                                                                               | 250 W, 40<br>kHz | RhB<br>[10 mg L <sup>-1</sup> ] |        | <sup>6</sup> |
| 7 | Co-<br>doped<br>MoS <sub>2</sub>                                 | dye<br>degradati<br>on                | 99.2% in 60 s                                                                                                                                   |                  | MB<br>[5 mg L <sup>-1</sup> ]   | 10 mg  | <sup>7</sup> |
|   | MoS <sub>2</sub>                                                 |                                       | 36.5% in 60 s                                                                                                                                   |                  |                                 |        |              |
| 8 | glutathi<br>one<br>modifie<br>d<br>acidize<br>d-MoS <sub>2</sub> | Piezo-<br>photo<br>Water<br>splitting | H <sub>2</sub> : 1250<br>μmol g <sup>-1</sup> h <sup>-1</sup>                                                                                   | 280 W            | 200 mL<br>water                 | 0.05 g | <sup>8</sup> |
| 9 | Au-                                                              | Piezo-                                | 99.999% in                                                                                                                                      | Visible          | E.Coli                          | 2 mg   | <sup>9</sup> |

|    |                           |                                        |                                                                         |                                      |                                                                |                 |    |
|----|---------------------------|----------------------------------------|-------------------------------------------------------------------------|--------------------------------------|----------------------------------------------------------------|-----------------|----|
|    | MoS <sub>2</sub>          | photo<br>Bacterial<br>Sterilization    | 15 min<br>(photo+piezo),<br>45 min for<br>piezo,<br>60 min for<br>photo | light and<br>mechanical<br>vibration | (2 × 10 <sup>6</sup> CFU<br>/mL)                               |                 |    |
| 10 | Fe@3D<br>-WS <sub>2</sub> | Levofloxacin and<br>Dye<br>degradation | 99.6% in 12<br>min<br>98% within<br>30 s                                | 40 kHz;<br>100 W                     | Levofloxacin<br>(25 mg/L)<br>Rhodamine<br>(1000 ppm,<br>20 mL) | 20 mg<br>0.01 g | 10 |
|    | 3D-<br>WS <sub>2</sub>    |                                        | 63% in 12<br>min                                                        |                                      | Levofloxacin<br>(25 mg/L)                                      | 20 mg           |    |

The 2D TMDCs based catalyst shows high efficiency towards piezocatalytic dye degradation and other application like water splitting, antibacterial activity and H<sub>2</sub> evolution. But uptill now mostly catalyst in powder or solution form has been used. The use of thin-film catalyst is very rare. Thin film based catalyst have advantage of easy/good recovery and recyclability with negligible loss of catalyst. Powder or solution-based catalyst has difficult process for catalyst recovery and suffers catalyst loss. Hence recyclability which is one of the very important factors for practical industry-based requirement, becomes difficult. Hence the developed large area thin film based WS<sub>2</sub> grown on sapphire substrate with piezo catalyst behaviour opens up platform for developing reusable, low cost catalyst for dye degradation. There are very few reports on the use of thin-film based catalyst. The existing literature

survey direct us towards the future directions which can be integration of WS<sub>2</sub> with other material which can increase its activity multiple times.

## References:

- 1 R. Cao, R. Wu, D. Zhang and S. Xu, *Appl. Surf. Sci.*, 2021, **553**, 149557.
- 2 S. Li, Z. Zhao, D. Yu, J. Z. Zhao, Y. Su, Y. Liu, Y. Lin, W. Liu, H. Xu and Z. Zhang, *Nano Energy*, 2019, **66**, 104083.
- 3 S. Masimukku, Y. Hu, Z. Lin, S. Chan and T. Chou, *Nano Energy*, 2018, **46**, 338–346.
- 4 W. I. N. T. Yein, W. Qun, J. Jiahuang, L. I. Yang and W. U. Xiaohong, *Chem. Res. Chinese Univ.*, 2019, **35**, 892–900.
- 5 M. Wu, J. Lee, Y. J. Chung, M. Srinivaas and J. Wu, *Nano Energy*, 2017, **40**, 369–375.
- 6 J. M. Wu, W. E. Chang, Y. T. Chang and C. Chang, *Adv. Mater.*, 2016, **28**, 3718–3725.
- 7 W. T. Yein, Q. Wang, Y. Li and X. Wu, *Catal. Commun.*, 2019, **125**, 61–65.
- 8 Y. Sua, L. Zhang, W. Wang, X. Li, Y. Zhanga and D. Shao, *J. Mater. Chem. A*, 2018, **6**, 11909–11915.
- 9 T. Chou, S. Chan, Y. Lin, P. Yang, C. Liu, Y. Lin, J.-M. Wu, J. Lee and Z. Lin, *Nano Energy*, 2019, **57**, 14–21.
- 10 F. Meng, W. Ma, C. Duan, X. Liu, Z. Chen, M. Wang, J. Gao and Z. Zhang, *Appl. Catal. B Environ.*, 2019, **252**, 187–197.
